# Supplementary material for: HIV-1 Infection Is Associated With Increased Prevalence and Abundance of Plasmodium falciparum Gametocyte-Specific Transcripts in Asymptomatic Adults in Western Kenya
Source: Frontiers journal article supplement (doi:10.3389/fcimb.2020.600106), 2021-02-05
Supplement: Data_Sheet_1.PDF [file Data_Sheet_1.PDF]

## Supplementary Material

### 1 Supplementary Figures and Tables

#### 1.1 Supplementary Figures

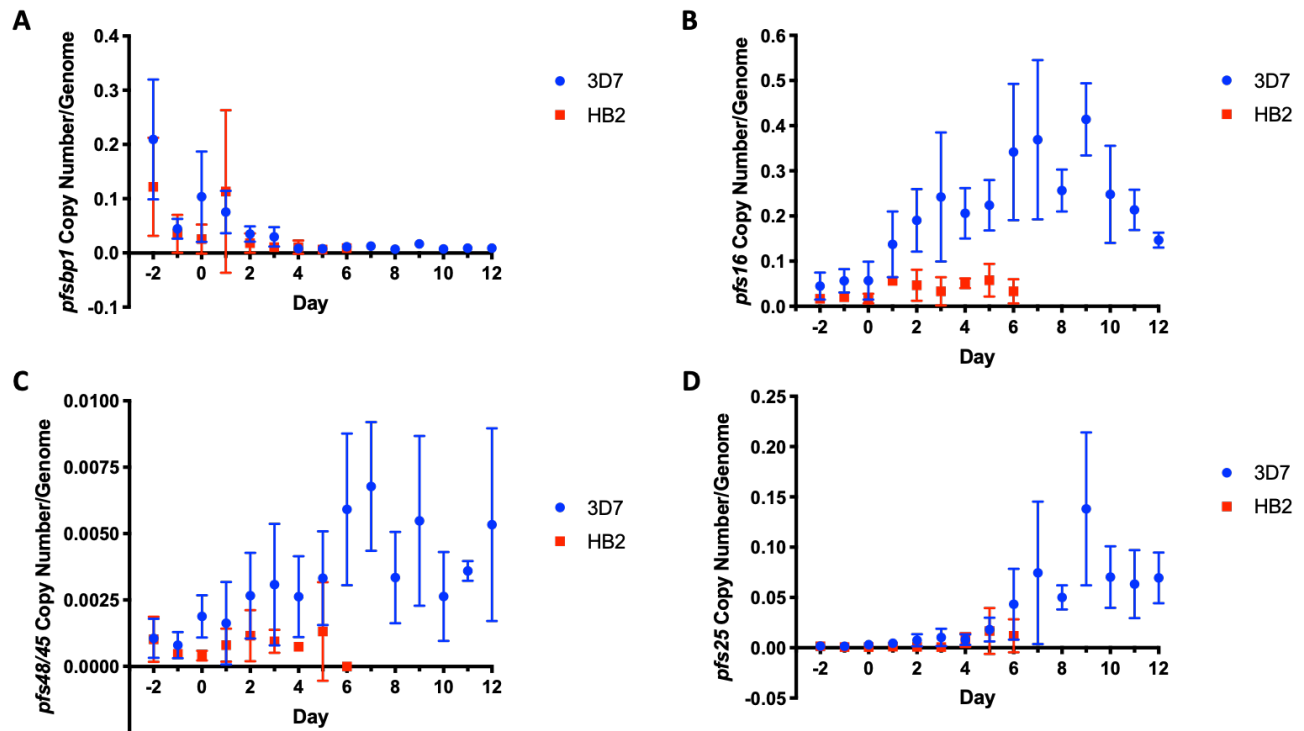

**Supplementary Figure 1.** Copy numbers per genome for A) *pfsbp1*, B) *pfs16*, C) *pfs48/45*, and D) *pfs25* during gametocyte development for 3D7 and HB-2 parasites. Culture medium was doubled on day -1 and heparin was added to culture medium from days 1 to 12. *pfsbp1* expression decreased after the addition of heparin to the medium on day 1 (A), while *pfs16* expression increased after the doubling of medium on day -1 (B). *pfs48/45* was expressed at higher levels during intermediate stages of gametocyte development (C), while *pfs25* expression was elevated during the late stages of gametocyte development (D). Overall, *pfs48/45* was expressed at a much lower level than the other markers.

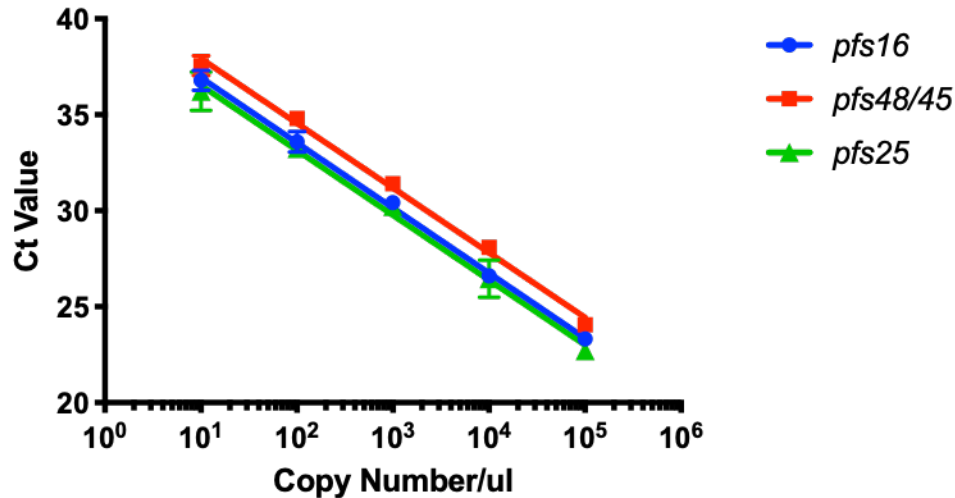

**Supplementary Figure 2.** Representative standard curves for *pfs16*, *pfs48/45* and *pfs25*. For *pfs16*, the slope was -3.392,  $R^2 = 0.9953$  and PCR efficiency was 97.16%. For *pfs48/45*, the slope was -3.372,  $R^2 = 0.9940$  and PCR efficiency was 97.95%. For *pfs25*, the slope was -3.382,  $R^2 = 0.9846$  and PCR efficiency was 97.55%. Standard curves were considered acceptable if PCR efficiency was determined to be 90% to 105%.

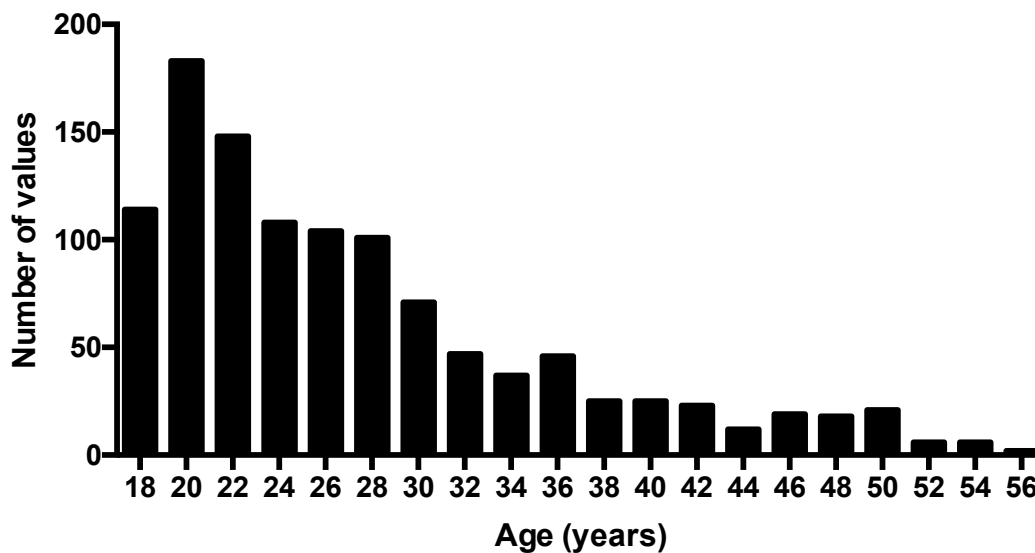

**Supplementary Figure 3.** Frequency distribution of age in years for the 1,116 *Plasmodium 18S*-positive samples used in this study. The study population consisted primarily of individuals 30 years of age or younger. For analysis of gametocyte prevalence by age, the study population was divided into quartiles comprised of 18-20 years, 21-24 years, 25-30 years and 31-56 years.

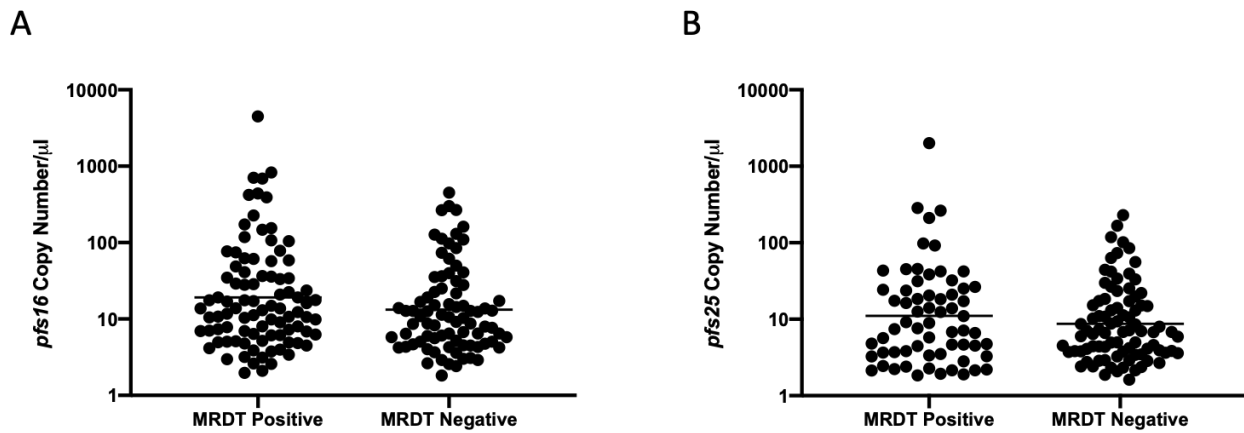

**Supplementary Figure 4.** Comparison of *pfs16* (A) and *pfs25* (B) transcript copy number per  $\mu\text{l}$  by malaria RDT (MRDT) status. Black lines indicate geometric means. Transcript copy numbers per  $\mu\text{l}$  were not significantly different between groups by Mann-Whitney test (*pfs16*:  $P=0.1157$ , *pfs25*:  $P=0.4844$ ).

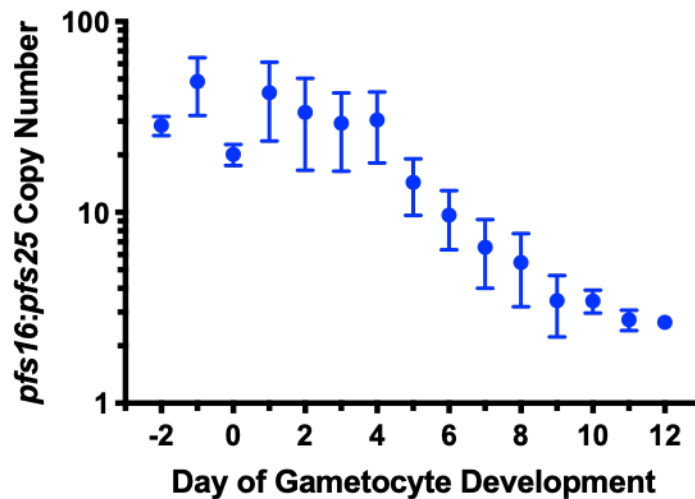

**Supplementary Figure 5.** Ratio of *pfs16* to *pfs25* expression over time in 3D7 parasites during gametocyte development. Although *pfs16* is considered to be an early gametocyte marker, expression levels remain higher than *pfs25* in mature gametocytes.

## 1.2 Supplementary Tables

**Supplementary Table 1.** *P. falciparum* markers, protein function, and predicted timing of mRNA expression. All markers were used to test 126 samples from 18S-positive volunteers. *pfs16*, *pfs48/45* and *pfs25* were selected for characterization of the full cohort.

| Marker          | Protein Function                                                                                                                                  | Predicted Timing of mRNA Expression                                                                                                                                                                                                                                       |
|-----------------|---------------------------------------------------------------------------------------------------------------------------------------------------|---------------------------------------------------------------------------------------------------------------------------------------------------------------------------------------------------------------------------------------------------------------------------|
| <i>pfAP2-G</i>  | Transcriptional master regulator of gametocytogenesis (Kafsack et al., 2014)                                                                      | Prior to gametocyte development, in committed parasites (Kafsack et al., 2014)                                                                                                                                                                                            |
| <i>pfs16</i>    | Expressed on the membrane of the parasitophorous vacuole of gametocytes, non-essential for gametocyte development (Kongkasuriyachai et al., 2004) | Highly expressed early in gametocyte development (stages I, II); expressed at a lower level during later stages, equally expressed by male and female (Lanfrancotti et al., 2007), (López-Barragán et al., 2011), (Lasonder et al., 2016), (Bahamontes-Rosa et al., 2016) |
| <i>pfs48/45</i> | 6-cysteine protein, important for male gamete fertility (van Dijk et al., 2001)                                                                   | Expressed from stage II through stage V (López-Barragán et al., 2011)                                                                                                                                                                                                     |
| <i>pfs230p</i>  | 6-cysteine protein, important for ookinete formation and transmission to mosquitoes (Marin-Mogollon et al., 2018)                                 | Expressed by stage V male gametocytes (López-Barragán et al., 2011), (Lasonder et al., 2016)                                                                                                                                                                              |
| <i>pfs25</i>    | Ookinete surface protein (Kaslow et al., 1988)                                                                                                    | Highly expressed by Stage V female gametocytes (López-Barragán et al., 2011), (Lasonder et al., 2016)                                                                                                                                                                     |
| <i>pfsbp1</i>   | Maurer's cleft protein, transports PfEMP-1 to the cell surface (Blisnick et al., 2000), (Maier et al., 2006)                                      | Expressed by ring stage trophozoites (Otto et al., 2010)                                                                                                                                                                                                                  |
| <i>pfAQP</i>    | Single copy gene encoding an aquaglyceroporin (Hansen et al., 2002)                                                                               | Expressed by blood stage parasites (Hansen et al., 2002)                                                                                                                                                                                                                  |

**Supplementary Table 2.** qPCR primer and probe sequences. Full-length parasite gene sequences were obtained from PlasmoDB using the GeneID listed below the target name. The 5' end of each probe is labeled with a fluorophore (ABY, JUN, FAM, or VIC). The 3' end of each probe is labeled with either a QSY quencher or a minor groove binder (MGB) and non-fluorescent quencher (NFQ).

| Target                           | Forward Primer, Reverse Primer, and Probe Sequences |                                                      | Amplicon Size (bp) |
|----------------------------------|-----------------------------------------------------|------------------------------------------------------|--------------------|
| <i>pfAP2-G</i><br>PF3D7_1222600  | Forward                                             | 5' TTC AAC CCA AAC ATT TAA ACT TAC TCA 3'            | 160                |
|                                  | Reverse                                             | 5' AAT CTC GAA GAT ACG ATT ATC AAC GA 3'             |                    |
|                                  | Probe                                               | ABY 5' CGA ATG GGA AGA GAG CAT GCA ATG AAG 3' QSY    |                    |
| <i>pfs16</i><br>PF3D7_0406200    | Forward                                             | 5' GGA TCC CCT TCA ACT TTG CA 3'                     | 89                 |
|                                  | Reverse                                             | 5' CCT TGA GAT AGT CCA CCT TGA TTA GG 3'             |                    |
|                                  | Probe                                               | JUN 5' TTC TTC AGG TGC CTC TCT TCA TGC TGT TG 3' QSY |                    |
| <i>pf27/25</i><br>PF3D7_1302100  | Forward                                             | 5' AGC CCT TGG ATA AAT TTG GAA AT 3'                 | 105                |
|                                  | Reverse                                             | 5' AAA GTT GGG GAT ATT GAG TTT CAT G 3'              |                    |
|                                  | Probe                                               | JUN 5' AAA CAC ATG CCC CTC TCT CAC CTC GTA TT 3' QSY |                    |
| <i>pfs48/45</i><br>PF3D7_1346700 | Forward                                             | 5' TGT AAG CCT AGC TCT TTG AAT AGT GAA 3'            | 101                |
|                                  | Reverse                                             | 5' TCA CGC ATA TCT GGC TTT AAA TTA TG 3'             |                    |
|                                  | Probe                                               | VIC 5' TAT CTG GAT TCA TAG GAT ATA AG 3' MGBNFQ      |                    |
| <i>pfs230p</i><br>PF3D7_0208900  | Forward                                             | 5' CCC AAC TAA TCG AAG GGA TGA A 3'                  | 196                |
|                                  | Reverse                                             | 5' TTA CCA AAA AAT GCT CCT AAA CGT T 3'              |                    |
|                                  | Probe                                               | VIC 5' CAA AAC GAT CAA ACC ATC TC 3' MGBNFQ          |                    |
| <i>pfs25</i><br>PF3D7_1031000    | Forward                                             | 5' TCT GAA ATG TGA CGA AAA GAC TGT 3'                | 88                 |
|                                  | Reverse                                             | 5' AGC GTA TGA AAC GGG ATT TCC 3'                    |                    |
|                                  | Probe                                               | FAM 5' ATA AAC CAT GTG GAG ATT T 3' MGBNFQ           |                    |
| <i>pfsbp1</i><br>PF3D7_0501300   | Forward                                             | 5' AAA GTA CTC CTT GTT GGC AAC GTA 3'                | 73                 |
|                                  | Reverse                                             | 5' TTA ATG AAT ACG AAG TAG AAT CTC CAG C 3'          |                    |
|                                  | Probe                                               | FAM 5' AAT GGC TCA AGA AGC 3' MGBNFQ                 |                    |
| <i>pfAQP</i><br>PF3D7_1132800    | Forward                                             | 5' CCA TCA AGA GAT TTA GGA TCC AGA TT 3'             | 98                 |
|                                  | Reverse                                             | 5' GCT ACA AGA GGT ACC CAA AAA TAA AAA 3'            |                    |
|                                  | Probe                                               | FAM 5' TTG CAT ATG GAA AAG ATA CCT 3' MGBNFQ         |                    |

**Supplementary Table 3.** Comparison of *pfs16* transcript prevalence by HIV-1 status in 1,116 *Plasmodium falciparum*-positive samples. Data are represented as numbers of samples and percentages (in parentheses) of the total cohort. HIV-1 positivity was associated with increased *pfs16* prevalence (P=0.0271, RR=1.541, Fisher's exact test).

|                     | <i>pfs16</i> Positive | <i>pfs16</i> Negative | Total          |
|---------------------|-----------------------|-----------------------|----------------|
| <b>HIV Positive</b> | 29 (2.6%)             | 100 (9.0%)            | 129 (11.6%)    |
| <b>HIV Negative</b> | 144 (12.9%)           | 843 (75.5%)           | 987 (88.4%)    |
| <b>Total</b>        | 173 (15.5%)           | 943 (84.5%)           | 1,116 (100.0%) |

**Supplementary Table 4.** Comparison of *pfs25* transcript prevalence by HIV-1 status in 1,116 *Plasmodium falciparum*-positive samples. Data are represented as numbers of samples and percentages (in parentheses) of the total cohort. HIV-1 positivity was associated with increased *pfs25* prevalence (P<0.0001, RR=2.243, Fisher's exact test)

|                     | <i>pfs25</i> Positive | <i>pfs25</i> Negative | Total          |
|---------------------|-----------------------|-----------------------|----------------|
| <b>HIV Positive</b> | 34 (3.0%)             | 95 (8.5%)             | 129 (11.6%)    |
| <b>HIV Negative</b> | 116 (10.4%)           | 871 (78.1%)           | 987 (88.4%)    |
| <b>Total</b>        | 150 (13.4%)           | 966 (86.6%)           | 1,116 (100.0%) |

**Supplementary Table 5.** Comparison of gametocyte-positive samples (n) by HIV-1 status, age and gender. Positive (%) volunteers were positive for at least one gametocyte marker. For each gender and age bracket, significant differences by HIV-1 status were evaluated by Fisher's exact test and relative risk (RR) is indicated for age brackets that were significantly different.

| <b>HIV-Positive</b> |             |                     |               |                     |                |           |
|---------------------|-------------|---------------------|---------------|---------------------|----------------|-----------|
| <b>Age</b>          | <b>Male</b> |                     | <b>Female</b> |                     | <b>P Value</b> | <b>RR</b> |
|                     | <b>n</b>    | <b>Positive (%)</b> | <b>n</b>      | <b>Positive (%)</b> |                |           |
| 18-20               | 2           | 1 (50.0)            | 8             | 1 (12.5)            | 0.38           | ns        |
| 21-24               | 5           | 2 (40.0)            | 14            | 7 (50.0)            | 1.00           | ns        |
| 25-30               | 25          | 5 (20.0)            | 23            | 8 (34.8)            | 0.33           | ns        |
| 31-56               | 40          | 15 (37.5)           | 12            | 5 (41.7)            | 1.00           | ns        |
| <b>Total</b>        | <b>72</b>   | <b>23 (32.9)</b>    | <b>57</b>     | <b>21 (36.9)</b>    | <b>0.58</b>    | <b>ns</b> |

| <b>HIV-Negative</b> |             |                     |               |                     |                |           |
|---------------------|-------------|---------------------|---------------|---------------------|----------------|-----------|
| <b>Age</b>          | <b>Male</b> |                     | <b>Female</b> |                     | <b>P Value</b> | <b>RR</b> |
|                     | <b>n</b>    | <b>Positive (%)</b> | <b>n</b>      | <b>Positive (%)</b> |                |           |
| 18-20               | 127         | 21 (16.5)           | 160           | 26 (16.3)           | 0.87           | ns        |
| 21-24               | 96          | 19 (19.8)           | 141           | 38 (27.0)           | 0.22           | ns        |
| 25-30               | 106         | 20 (18.9)           | 122           | 20 (16.4)           | 0.73           | ns        |
| 31-56               | 107         | 29 (27.1)           | 128           | 12 (9.4)            | 0.0005         | 2.89      |
| <b>Total</b>        | <b>436</b>  | <b>89 (20.4)</b>    | <b>551</b>    | <b>96 (17.4)</b>    | <b>0.22</b>    | <b>ns</b> |

### 1.3 References for Supplementary Table 1

- Bahamontes-Rosa, N., Gomez-Lorenzo, M.G., Lelièvre, J., Rodriguez Alejandre, A., Almela, M.J., Lozano, S., Herreros, E., and Gamó, F.J. (2016) A novel validated assay to support the discovery of new anti-malarial gametocytocidal agents. *Malar J*, 15:385.
- Blisnick, T., Betoulle, M.E.M., Barale, J.-C., Uzureau, P., Berry, L., Desroses, S., Fujioka, H., Mattei, D., and Breton, C.B. (2000) Pfsbp1, a Maurer's cleft *Plasmodium falciparum* protein, is associated with the erythrocyte skeleton. *Mol Biochem Parasitol*, 111:107-121.
- Hansen, M., Kun, J.F., Schultz, J.E., and Beitz, E. (2002) A single, bi-functional aquaglyceroporin in blood-stage *Plasmodium falciparum* malaria parasites. *J Biol Chem*, 277:4874-4882.
- Kafsack, B.F., Rovira-Graells, N., Clark, T.G., Bancells, C., Crowley, V.M., Campino, S.G., Williams, A.E., Drought, L.G., Kwiatkowski, D.P., Baker, D.A., Cortés, A., and Llinás, M. (2014) A transcriptional switch underlies commitment to sexual development in malaria parasites. *Nature*, 507:248-252.
- Kaslow, D.C., Quakyi, I.A., Syin, C., Raum, M.G., Keister, D.B., Coligan, J.E., McCutchan, T.F., and Miller, L.H. (1988) A vaccine candidate from the sexual stage of human malaria that contains EGF-like domains. *Nature*, 333:74.
- Kongkasuriyachai, D., Fujioka, H., and Kumar, N. (2004) Functional analysis of *Plasmodium falciparum* parasitophorous vacuole membrane protein (Pfs16) during gametocytogenesis and gametogenesis by targeted gene disruption. *Mol Biochem Parasitol*, 133:275-285.
- Lanfrancotti, A., Bertuccini, L., Silvestrini, F., and Alano, P. (2007) *Plasmodium falciparum*: mRNA co-expression and protein co-localisation of two gene products upregulated in early gametocytes. *Exp Parasitol*, 116:497-503.
- Lasonder, E., Rijpma, S.R., van Schaijk, B., Hoeijmakers, W., Kensche, P.R., Gresnigt, M.S., Italiaander, A., Vos, M.W., Woestenenk, R., Bousema, T., Mair, G.R., Khan, S.M., Janse, C.J., Bártfai, R., and Sauerwein, R.W. (2016) Integrated transcriptomic and proteomic analyses of gametocytes: molecular insight into sex-specific processes and translational repression. *Nucleic Acids Res*, 44:6087-6101.
- López-Barragán, M.J., Lemieux, J., Quiñones, M., Williamson, K.C., Molina-Cruz, A., Cui, K., Barillas-Mury, C., Zhao, K., and Su, X.-z. (2011) Directional gene expression and antisense transcripts in sexual and asexual stages of *Plasmodium falciparum*. *BMC Genomics*, 12:498.
- Maier, A.G., Rug, M., O'Neill, M.T., Beeson, J.G., Marti, M., Reeder, J., and Cowman, A.F. (2006) Skeleton-binding protein 1 functions at the parasitophorous vacuole membrane to traffic PfEMP1 to the *Plasmodium falciparum*-infected erythrocyte surface. *Blood*, 109:1289-1297.
- Marin-Mogollon, C., van de Vegte-Bolmer, M., van Gemert, G.J., van Pul, F.J.A., Ramesar, J., Othman, A.S., Kroeze, H., Miao, J., Cui, L., Williamson, K.C., Sauerwein, R.W., Janse, C.J., and



Khan, S.M. (2018) The *Plasmodium falciparum* male gametocyte protein P230p, a paralog of P230, is vital for ookinete formation and mosquito transmission. *Sci Rep*, 8:14902.

Otto, T.D., Wilinski, D., Assefa, S., Keane, T.M., Sarry, L.R., Böhme, U., Lemieux, J., Barrell, B., Pain, A., Berriman, M., Newbold, C., and Llinás, M. (2010) New insights into the blood-stage transcriptome of using RNA-Seq. *Mol Microbiol*, 76:12-24.

van Dijk, M.R., Janse, C.J., Thompson, J., Waters, A.P., Braks, J.A.M., Dodemont, H.J., Stunnenberg, H.G., van Gemert, G.-J., Sauerwein, R.W., and Eling, W. (2001) A central role for P48/45 in malaria parasite male gamete fertility. *Cell*, 104:153-164.
